# Supplementary material
Source: publisher figshare collection journal article supplement (https://acs.figshare.com/ndownloader/files/4653883)
Supplement: Supplementary file 1 [file 4653883]

# Direct Ligation of Carrier Protein-Bound Thioesters: A Versatile Method for the Characterization of Fatty Acid Tailoring Enzymes during Lipopeptide Biosynthesis

**Table S1.** Oligonucleotide pairs used for PCR amplification reactions.

| Oligonucleotide Primers (5'-3')           | Restriction Site | Expression vector | target gene                      |
|-------------------------------------------|------------------|-------------------|----------------------------------|
| AAAAAAGGATCCATGAGTACGGACCCCA<br>AGTCGGTTG | BamHI            | pQTev             | <i>ACP</i><br>( <i>Sco3249</i> ) |
| AAAAAAAGCTTTTCACGCCGCTTCCAGA<br>CCCG      | HindIII          |                   |                                  |
| AAAAAAGAATTTCACGCAACGCGAAGAAG<br>AGCTGGCC | EcoRI            | pET28a(+)         | <i>hxcO</i>                      |
| AAAAAACTCGAGCGGGCGTACTCCGGCC<br>TGCA      | XhoI             |                   |                                  |
| AAAAAAGAATTCCCGAAGCTGCGGATCG<br>CAGTCG    | EcoRI            | pET28a(+)         | <i>hcmO</i>                      |
| AAAAAACTCGCTCGAGCGGCGGCGGCAG<br>CGGTG     | XhoI             |                   |                                  |

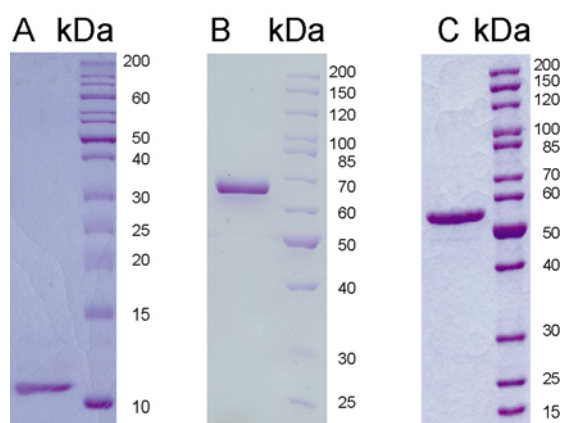

**Figure S1.** Coomassie stained SDS-PAGE of purified ACP (A, 11.5 kDa), HxcO (B, 66.8 kDa), and HcmO (B, 47.0 kDa).

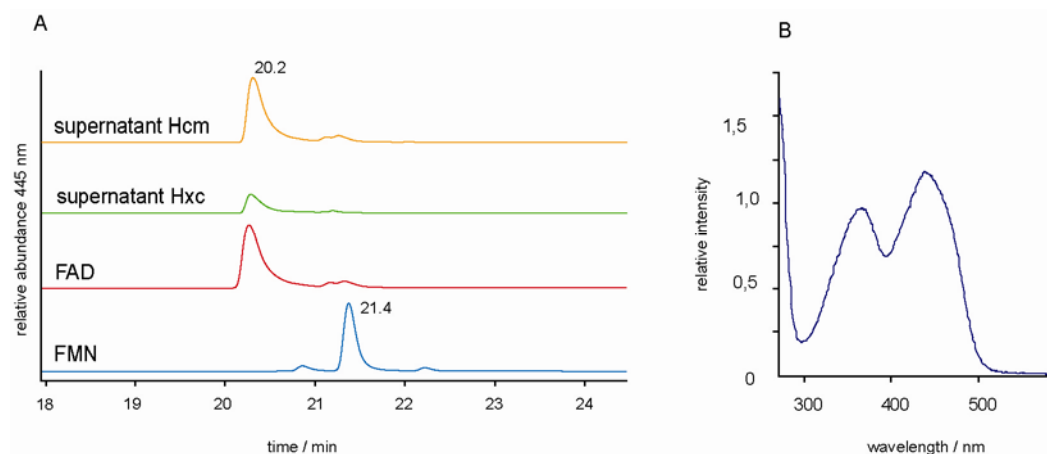

**Figure S2.** HPLC Analysis of HxcO and HcmO cofactor and UV-visible spectrum of HcmO. The UV-visible spectrum of HcmO highlights the  $\lambda_{\text{max}}$  at 377 and 450 nm.

# Direct Ligation of Carrier Protein-Bound Thioesters: A Versatile Method for the Characterization of Fatty Acid Tailoring Enzymes during Lipopeptide Biosynthesis

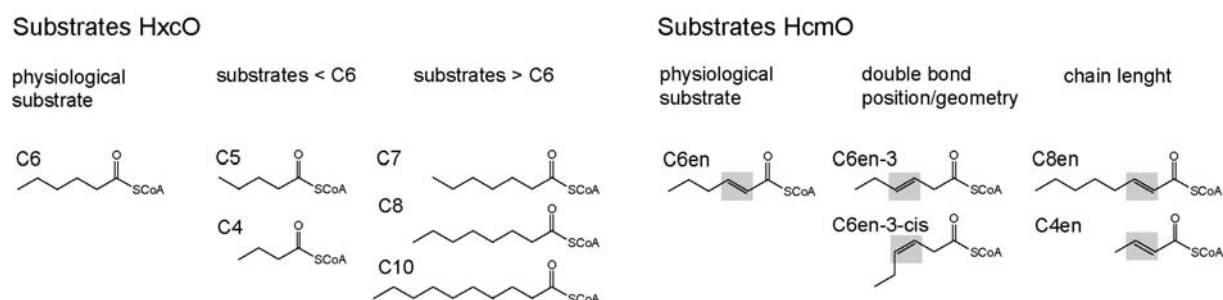

**Figure S3.** Acyl-CoA substrates used in this study.

**Table S2.** MALDI-TOF analysis of chemically synthesized fatty acid CoA derivatives.

| FA-CoA            | c.m. [M+H] <sup>+</sup> | o.m. [M+H] <sup>+</sup> |
|-------------------|-------------------------|-------------------------|
| C4                | 838.1                   | 838.2                   |
| C5                | 852.2                   | 852.2                   |
| C6                | 866.2                   | 866.1                   |
| C7                | 880.2                   | 880.2                   |
| C8                | 894.2                   | 894.1                   |
| C10               | 922.2                   | 922.2                   |
| C6-EN2            | 864.2                   | 864.1                   |
| C8-EN2            | 892.2                   | 892.2                   |
| C4-EN2 (crotonyl) | 836.1                   | 836.2                   |
| C6-EN3            | 864.2                   | 864.2                   |
| C6-EN3cis         | 864.2                   | 864.2                   |

**Table S3.** MALDI-TOF analysis of chemoenzymatically synthesized CDA derivatives.

|                 | c.m. [M+H] <sup>+</sup> | o.m. [M+H] <sup>+</sup> |
|-----------------|-------------------------|-------------------------|
| Hexanoyl-CDA    | 1466.6                  | 1466.7                  |
| Hex-2-enoyl-CDA | 1464.5                  | 1464.7                  |

**Table S4.** [M+H]<sup>2+</sup> mass fragments of fatty acid-S-Ppan-PCP (Lys<sup>57</sup>-Arg<sup>71</sup>) subjected to MS<sup>2</sup>.

| Chain length | Saturated fatty acid | Unsaturated fatty acid | Epoxidized fatty acid |
|--------------|----------------------|------------------------|-----------------------|
| C4           | 1032.5               | 1030.5                 | 1038.5                |
| C5           | 1039.5               | 1037.5                 | 1045.5                |
| C6           | 1046.5               | 1044.5                 | 1052.5                |
| C7           | 1053.5               | 1051.5                 | 1059.5                |
| C8           | 1060.5               | 1058.5                 | 1068.5                |
| C10          | 1074.5               | 1072.5                 | 1080.5                |

### Direct Ligation of Carrier Protein-Bound Thioesters: A Versatile Method for the Characterization of Fatty Acid Tailoring Enzymes during Lipopeptide Biosynthesis Assays with acyl-CoA substrates

Reaction mixtures for the detection of HxcO oxidation/epoxidation products were prepared using 250  $\mu\text{M}$  hexanoyl-CoA substrate, 5-50  $\mu\text{M}$  HxcO and 100  $\mu\text{M}$  FAD in assay buffer. Reaction mixtures for the detection of HcmO epoxidation product were prepared using 250  $\mu\text{M}$  hexenoyl-CoA substrate, 10  $\mu\text{M}$  HxcO, 250  $\mu\text{M}$  FAD and 250  $\mu\text{M}$  NAD(P)H in assay buffer. Incubations were carried out at different temperatures and several periods of time.

### Assays with chemoenzymatically synthesized CDA substrates

HxcO Assay: The reaction mixture contained 100  $\mu\text{M}$  hexanoyl-CDA, 20  $\mu\text{M}$  enzyme and 60  $\mu\text{M}$  FAD in a total volume of 75  $\mu\text{L}$ . After incubation at 25  $^{\circ}\text{C}$  for 30 min the reaction was quenched by the addition of 15  $\mu\text{L}$  formic acid and directly analyzed by LC-ESI-MS.

HcmO Assay: The reaction mixture contained 100  $\mu\text{M}$  hex-2-enoyl-CDA, 20  $\mu\text{M}$  enzyme, 60  $\mu\text{M}$  FAD, 100  $\mu\text{M}$  NAD(P)H in a total volume of 75  $\mu\text{L}$ . After incubation at 25  $^{\circ}\text{C}$  for 30 min the reaction was quenched by the addition of 15  $\mu\text{L}$  formic acid and directly analyzed by LC-ESI-MS.

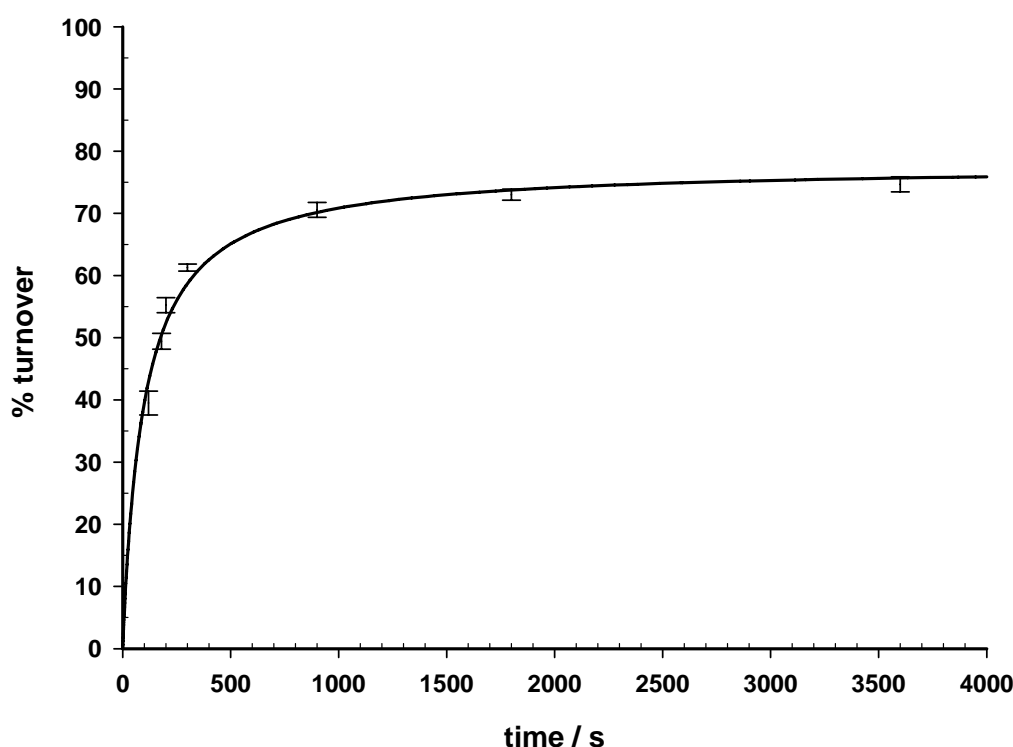

**Figure S4.** Kinetics of *(2R,3S)*-2,3-epoxyhexanoic-*S*-Ppan-ACP formation mediated by HxcO. Samples were trypsinized at different time points following initiation of the enzymatic reactions, and were then fractionated and analyzed by HPLC-MS<sup>2</sup>. The percentage of HxcO reaction product tethered to the ACP is plotted as a function of time.
